# Supplementary material for: Constitutive activation of smoothened (SMO) in mammary glands of transgenic mice leads to increased proliferation, altered differentiation and ductal dysplasia
Source: Oxford University Press journal article supplement (doi:10.1242/dev.02797), 2007-02-08
Supplement: dev02797tables1.pdf [file dev02797tables1.pdf]

**Table S1. Average percentage ( $\pm$ s.d.) of mammary epithelial cells showing marker expression/co-expression at 10 weeks of age according to genotype**

| Marker            | Genotype  |                  |                     |                  |                       |           |                  |                         |                  |                       |
|-------------------|-----------|------------------|---------------------|------------------|-----------------------|-----------|------------------|-------------------------|------------------|-----------------------|
|                   | Wild type |                  | <i>MMTV-SmoM2/+</i> |                  | <i>P</i> <sup>†</sup> | Wild type |                  | $\Delta$ <i>Ptch1/+</i> |                  | <i>P</i> <sup>†</sup> |
|                   | <i>n</i>  | %*               | <i>n</i>            | %*               |                       | <i>n</i>  | %*               | <i>n</i>                | %*               |                       |
| SMO               | 15        | 0.0 (0.0-0.0)    | 8                   | 5.7 (3.3-6.5)    | <0.01                 | 5         | 0.0 (0.0-0.0)    | 5                       | 0.0 (0.0-0.0)    | –                     |
| BrdU <sup>‡</sup> | 15        | 0.6 (0.2-1.2)    | 9                   | 4.4 (2.3-10.1)   | 0.02                  | 6         | 0.7 (0.6-0.8)    | 5                       | 11.3 (7.5-11.7)  | 0.02                  |
| Ki67              | 4         | 6.2 (4.4-8.5)    | 6                   | 31.3 (28.4-36.1) | 0.04                  |           | ND               |                         | ND               | –                     |
| Casp-3            | 6         | 0.1 (0.0-0.4)    | 6                   | 0.5 (0.2-1.0)    | 0.35                  | 5         | 0.6 (0.4-0.8)    | 7                       | 0.0 (0.0-0.8)    | 0.33                  |
| ER                | 12        | 32.9 (29.2-42.1) | 6                   | 33.0 (24.1-40.9) | 0.75                  | 5         | 30.7 (27.5-32.7) | 4                       | 26.7 (21.7-33.8) | 0.42                  |
| PR                | 12        | 38.8 (27.7-41.8) | 6                   | 29.8 (24.8-34.4) | 0.34                  | 5         | 26.0 (23.1-33.2) | 5                       | 29.2 (24.7-39.0) | 0.69                  |
| CK6               | 8         | 7.5 (5.6-9.0)    | 8                   | 18.4 (12.6-25.9) | 0.01                  | 4         | 0.0 (0.0-0.2)    | 7                       | 0.0 (0.0-0.0)    | 0.89                  |
| ER-Ki67           | 4         | 0.0 (0.0-0.0)    | 6                   | 1.0 (1.0-1.0)    | 0.05                  |           | ND               |                         | ND               | –                     |
| ER-CK6            | 6         | 7.0 (5.8-8.2)    | 5                   | 14.2 (11.0-14.2) | 0.06                  |           | ND               |                         | ND               | –                     |
| SMO-Ki67          | 5         | 0.0 (0.0-0.0)    | 5                   | 0.0 (0.0-0.0)    | –                     |           | ND               |                         | ND               | –                     |
| SMO-ER            | 5         | 0.0 (0.0-0.0)    | 5                   | 0.0 (0.0-0.0)    | –                     |           | ND               |                         | ND               | –                     |
| SMO-CK6           | 5         | 0.0 (0.0-0.0)    | 5                   | 0.0 (0.0-0.0)    | –                     |           | ND               |                         | ND               | –                     |

ND, not done.

\*Shown as median (interquartile range).

<sup>†</sup>*P* values are based on the Wilcoxon rank-sum test.

<sup>‡</sup>BrdU incorporation.
